# Supplementary material for: Bias in pharmacoepidemiologic studies using secondary health care databases: a scoping review
Source: PubMed Central journal article supplement (PMC6419460; doi:10.1186/s12874-019-0695-y), 2019-03-11
Supplement: 12874_2019_695_MOESM1_ESM.pdf [file 12874_2019_695_MOESM1_ESM.pdf]

## Additional file 1

### Details of articles included in the review

| First author [Reference]<br>(Country) | Publication date | Journal category* | Type of article | Type of bias <sup>†</sup>                   |           |             |              |
|---------------------------------------|------------------|-------------------|-----------------|---------------------------------------------|-----------|-------------|--------------|
|                                       |                  |                   |                 | Confounding                                 | Selection | Measurement | Time-related |
| Weinstein RB [80] (USA)               | 2017 Dec.        | PUB               | Analysis        | CIN, U/RC                                   |           |             |              |
| Pottegård A [81] (Denmark)            | 2017 Dec.        | TOX               | Review          | TDC, U/RC                                   | PRO       |             |              |
| Wade RL [152] (USA)                   | 2017 Sep.        | HCS               | Analysis        |                                             |           | MISE        |              |
| Melamed A [82] (USA)                  | 2017 Sep.        | OBS               | Review          | CIN, U/RC                                   |           |             |              |
| Czwikla J [153] (Germany)             | 2017 Aug.        | HCS               | Analysis        |                                             |           | MISO        |              |
| Palmaro A [165] (France)              | 2017 May         | PUB               | Analysis        |                                             |           |             | ITB          |
| Cepeda MS [140] (USA)                 | 2017 Apr.        | PUB               | Analysis        |                                             | MD        | MISE        |              |
| Dong YH [83] (USA)                    | 2017 Mar.        | MGI               | Analysis        | U/RC                                        | DEP       |             | IMT          |
| Camplain R [141] (USA)                | 2017 Apr.        | PUB               | Analysis        |                                             | MD        | MISO        |              |
| Bourbeau J [84] (Canada)              | 2017 Feb.        | RES               | Review          | CIN (confounding by disease severity)       | SEL       |             |              |
| Palmaro A [142] (France)              | 2016 Dec.        | PHA               | Review          |                                             | SEL       |             | ITB          |
| Macías D [85] (Spain)                 | 2016 Dec.        | PUB               | Opinion         | CON                                         |           |             |              |
| Hudson M [86] (Canada)                | 2016 Jun.        | RHE               | Review          | CIN (confounding by disease severity), U/RC |           |             | IMT          |
| Pauly NJ [154] (USA)                  | 2016 Jun.        | HCS               | Analysis        |                                             |           | MISE        |              |
| Mazzali C [155] (Italy)               | 2016 Jun.        | HCS               | Review          |                                             |           | MISO        |              |
| Bérard A [87] (Canada)                | 2016 Apr.        | TOX               | Opinion         | CIN                                         | MD        | MISE, MISO  | IMT          |
| Haneuse S [88] (USA)                  | 2016 Apr.        | HPS               | Review          | CON                                         | SEL       | MIS         |              |
| Filion KB [89] (Canada)               | 2016 Mar.        | PUB               | Analysis        | CIN, U/RC                                   |           |             |              |
| Hampp C [156] (USA)                   | 2016 Mar.        | PUB               | Analysis        |                                             |           | MISE        |              |
| Haneuse S [63] (USA)                  | 2016 Jan.        | PUB               | Analysis        |                                             | MD        |             |              |

|                                  |           |     |                       |                                                  |                                |                                                                                  |          |
|----------------------------------|-----------|-----|-----------------------|--------------------------------------------------|--------------------------------|----------------------------------------------------------------------------------|----------|
| Golozar A [90] (USA)             | 2016 Jan. | END | Review                | CIN (confounding by disease severity)            | DEP                            |                                                                                  | IMT, TWB |
| Targownik LE [166] (Canada)      | 2015 Dec. | GAS | Review                |                                                  |                                |                                                                                  | IMT      |
| Willis AW [91] (USA)             | 2015 Nov. | NEU | Review                | HUE                                              | SEL                            | MISE, MISO                                                                       |          |
| Lanes S [143] (USA)              | 2015 Oct. | PHA | Review                |                                                  | MD                             | MISO                                                                             |          |
| Swanson SA [92] (USA)            | 2015 Sep. | PHA | Analysis              | CIN (confounding by disease severity), TDC, U/RC |                                |                                                                                  |          |
| Heinze G [93] (Austria)          | 2015 Aug. | TRA | Analysis              | U/RC                                             | MD                             | MISE, MISO                                                                       |          |
| Moore TJ [6] (USA)               | 2015 Jul. | PUB | Opinion               | CIN, U/RC                                        |                                | MISO                                                                             |          |
| Herrett E [144] (United Kingdom) | 2015 Jun. | PUB | Review                |                                                  | MD                             | MIS                                                                              |          |
| Moulis G [94] (France)           | 2015 Jun. | MGI | Review                | CON                                              | MD                             | MISE, MISO                                                                       |          |
| Jensen ET [95] (USA)             | 2015 Mar. | PUB | Analysis              | CON                                              | SEL                            |                                                                                  |          |
| Patorno E [40] (USA)             | 2015 Mar. | PUB | Review                | CIN, TDC, over-adjustment                        | DEP, PRO, INC, competing risks | MISE, MISO, temporal ambiguity, detection bias, misclassification of confounders | IMT      |
| Weil G [145] (France)            | 2015 Feb. | ANE | Review                |                                                  | MD                             |                                                                                  |          |
| Funk MJ [96] (USA)               | 2014 Dec. | –   | Review                | CIN, HUE                                         |                                | MISE, MISO, misclassification of confounders                                     |          |
| Patorno E [41] (USA)             | 2014 Nov. | END | Review                | CIN, TDC, over-adjustment                        | DEP, PRO, INC, competing risks | MISE, MISO, temporal ambiguity, detection bias, misclassification of confounders | IMT      |
| de Groot MC [54] (Netherlands)   | 2014 Oct. | PUB | Analysis (simulation) |                                                  | Referral bias                  | MISE, MISO                                                                       |          |
| Li X [146] (USA)                 | 2014 Sep. | HPS | Analysis              |                                                  | MD                             | MISE                                                                             |          |
| Matok I [167] (Canada)           | 2014 Sep. | TOX | Reanalysis            |                                                  |                                |                                                                                  | IMT      |
| Kim DH [14] (USA)                | 2014 Sep. | PHA | Review                | U/RC                                             |                                |                                                                                  |          |
| Winterstein AG [157] (USA)       | 2014 Aug. | PHA | Analysis              |                                                  |                                | MISO                                                                             |          |
| Datta R [97] (USA)               | 2014 Jun. | –   | Reanalysis            | CIN                                              |                                |                                                                                  |          |
| Schneeweiss S [98] (USA)         | 2014 Jun. | MGI | Opinion               | CON                                              |                                |                                                                                  |          |

|                                        |           |     |                       |                                             |          |            |               |
|----------------------------------------|-----------|-----|-----------------------|---------------------------------------------|----------|------------|---------------|
| Yang X [99] (China)                    | 2014 Jun. | –   | Opinion               | CIN                                         | DEP      |            | IMT           |
| Zhang J [100] (USA)                    | 2014 May  | RHE | Review                | CIN (confounding by disease severity)       |          |            |               |
| Gavrielov-Yusim N [101] (Israel)       | 2014 Mar. | PUB | Review                | U/RC                                        | SEL      | MISE, MISO | IMT           |
| Cook EA [168] (USA)                    | 2013 Nov. | –   | Analysis              |                                             |          |            | ITB           |
| Paxton C [102] (USA)                   | 2013 Nov. | –   | Review                | CON                                         | SEL      |            |               |
| Gallego B [103] (Australia)            | 2013 Nov. | HCS | Opinion               | U/RC                                        | SEL      |            |               |
| Ryan PB [104] (USA)                    | 2013 Sep. | –   | Analysis              | CIN, TDC                                    |          |            |               |
| Skurtveit S [158] (Norway)             | 2013 Sep. | HCS | Analysis              |                                             |          | MISE       |               |
| Hersh WR [105] (USA)                   | 2013 Aug. | HPS | Review                | CON                                         | SEL      | MIS        | TIM           |
| Lauffenburger JC [147] (Canada)        | 2013 Aug. | PHA |                       |                                             | MD       | MISE       |               |
| Maciejewski ML [148] (USA)             | 2013 Aug. | HPS | Reanalysis            |                                             | DEP      |            |               |
| Ali A [57] (USA)                       | 2013 Mar. | –   | Review                | CIN, TDC                                    | INC, DEP |            | IMT           |
| Suissa S [106] (Canada)                | 2012 Dec. | END | Review                | CIN                                         |          |            | IMT, TWB, TLB |
| Yang X [107] (China)                   | 2012 Dec. | END | Opinion               | CIN                                         | DEP      |            | IMT           |
| Hershman DL [108] (USA)                | 2012 Dec. | ONC | Review                | U/RC                                        | MD       | MIS        |               |
| Suling M [109] (Germany)               | 2012 Dec. | –   | Review                | CON                                         | PRO      |            |               |
| Kiri VA [110] (United Kingdom/Ireland) | 2012 Sep. | PUB | Review                | U/RC, CIN (confounding by disease severity) |          | MISE, MISO |               |
| Yang XL [111] (China)                  | 2012 Jul. | END | Review                | CIN,                                        | DEP      |            | IMT           |
| Gamble JM [55] (Canada)                | 2012 Jun. | HCS | Analysis (simulation) |                                             |          | MISE       |               |
| van Walraven C [8] (Canada)            | 2012 Feb. | PUB | Review                |                                             |          | MISO       | IMT           |
| Takahashi Y [58] (Japan)               | 2012 Feb. | PHA | Review                | U/RC, TDC                                   | MD       | MISE, MISO |               |
| Gamble JM [159] (Canada)               | 2012 Jan. | PHA | Analysis              |                                             |          | MISE       |               |
| Nelson JC [112] (USA)                  | 2012 Jan. | PHA | Analysis (simulation) | CON                                         | MD       | MISO       |               |
| van Walraven C [160] (Canada)          | 2011 Oct. | PUB | Analysis              |                                             |          | MISO       |               |
| Fung V [113] (USA)                     | 2011 Jul. | HPS | Review                | CIN, U/RC                                   | SEL      |            |               |

|                                                  |           |     |                                       |                                                                                                                                                                                                                         |                                                        |            |     |
|--------------------------------------------------|-----------|-----|---------------------------------------|-------------------------------------------------------------------------------------------------------------------------------------------------------------------------------------------------------------------------|--------------------------------------------------------|------------|-----|
| Zhang J [114] (USA)                              | 2011 Jun. | –   | Review                                | CIN                                                                                                                                                                                                                     |                                                        | MISO       | IMT |
| Hernan MA [115] (USA)                            | 2011 May  | PUB | Opinion                               | CON                                                                                                                                                                                                                     | SEL                                                    | MIS        |     |
| Hoover KW/ Grimes DA [161] (USA) (see #149)      | 2011 Mar. | OBS | Letter to the editor/ author response |                                                                                                                                                                                                                         |                                                        | MISO       |     |
| Suissa S [169] (Canada)                          | 2011 Mar. | PUB | Reanalysis                            |                                                                                                                                                                                                                         |                                                        |            | TWB |
| Ray WA [2] (USA)                                 | 2011 May  | PUB | Opinion                               | HUE                                                                                                                                                                                                                     | DEP                                                    | MISE, MISO | IMT |
| Dore DD [162] (USA)                              | 2011 Feb. | PHA | Analysis                              |                                                                                                                                                                                                                         |                                                        | MISO       |     |
| Grimes DA [149] (USA)                            | 2010 Nov. | OBS | Opinion                               |                                                                                                                                                                                                                         | SEL                                                    | MISO       |     |
| McNeil JJ [116] (Australia)                      | 2010 Oct. | –   | Opinion                               | CIN, U/RC                                                                                                                                                                                                               | INC, DEP, MD                                           |            |     |
| Ehrenstein V [117] (Denmark)                     | 2010 Aug. | –   | Review                                | CON                                                                                                                                                                                                                     | SEL                                                    | MEA        |     |
| Hudson M [118] (Canada)                          | 2010 Jun. | RHE | Review                                | CIN (confounding by disease severity)                                                                                                                                                                                   | DEP                                                    |            | IMT |
| Brookhart MA [18] (USA)                          | 2010 Jun. | HPS | Review                                | CIN (confounding by disease severity), HUE, U/RC (confounding by frailty), bias resulting from statistical control of an intermediate variable, instrumental variable (Z-bias) or collider-stratification bias (M-bias) | Health-care differential access bias                   |            |     |
| Velthove KJ [150] (Netherlands)                  | 2010 May  | –   | Analysis                              |                                                                                                                                                                                                                         | Testing bias, diagnostic suspicion bias, referral bias |            |     |
| Martin-Latry K [119] (France)                    | 2010 Mar. | PHA | Review                                | U/RC                                                                                                                                                                                                                    | MD                                                     | MISE       |     |
| Lévesque LE [68] (Canada)                        | 2010 Mar. | –   | Reanalysis                            |                                                                                                                                                                                                                         |                                                        |            | IMT |
| Giezen TJ [120] (Netherlands)                    | 2009 Oct. | PUB | Review                                | CIN (confounding by disease severity)                                                                                                                                                                                   |                                                        |            |     |
| Kiri VA [77] (United Kingdom/ Ireland) (see #69) | 2009 Sep. | PUB | Letter to the editor                  |                                                                                                                                                                                                                         |                                                        |            | IMT |
| Harpe SE [121] (USA)                             | 2009 Feb. | PHA | Review                                | CON                                                                                                                                                                                                                     | SEL                                                    | MISE, MISO |     |
| Schneeweiss S [15] (USA)                         | 2009 Feb. | NEU | Analysis                              | U/RC (confounding by frailty)                                                                                                                                                                                           |                                                        |            |     |
| Suissa S [170] (Canada)                          | 2008 Aug. | PUB | Reanalysis                            |                                                                                                                                                                                                                         |                                                        |            | ITB |

|                                                               |           |     |                                             |                                          |     |            |
|---------------------------------------------------------------|-----------|-----|---------------------------------------------|------------------------------------------|-----|------------|
| Giordano SH [122] (USA)                                       | 2008 Jun. | –   | Analysis                                    | CIN                                      | SEL |            |
| Pigeot I [123] (Germany)                                      | 2008 Mar. | PHA | Review                                      | CON                                      |     |            |
| Suissa S [69] (Canada)                                        | 2008 Feb. | PUB | Review                                      |                                          |     | IMT        |
| Strom BL [16] (USA)                                           | 2007 Oct. | HPS | Review                                      | CON                                      | SEL | MISE, MISO |
| Cramer JA [124] (USA)                                         | 2007 Oct. | MGI | Analysis                                    | CON                                      | SEL | MEA        |
| Terris DD [125] (USA)                                         | 2007 Jul. | PUB | Review                                      | HUE                                      | MD  | MISO       |
| Hughes MD [126] (USA)                                         | 2007 Apr. | MGI | Opinion                                     | CIN                                      |     |            |
| Suissa S [70] (Canada)                                        | 2007 Mar. | PHA | Review                                      |                                          |     | IMT        |
| Lanes SF [163] (USA)                                          | 2006 Nov. | TOX | Analysis                                    |                                          |     | MISO       |
| Smeeth L [22] (United Kingdom)                                | 2006 Oct. | PUB | Opinion                                     | CIN                                      | SEL |            |
| De Vries F [127] (Netherlands)                                | 2006 Oct. | PUB | Reanalysis                                  | U/RC, HUE                                |     |            |
| Suissa S/ Kiri VA [128] (Canada/<br>United Kingdom)           | 2006 Feb. | RES | Letter to the<br>editor/ author<br>response | CIN (confounding by disease<br>severity) |     | IMT        |
| Hennessy S [1] (USA)                                          | 2006 Mar. | TOX | Review                                      | U/RC                                     |     |            |
| Etminan M [129] (Canada)                                      | 2006 Jan. | PHA | Review                                      | CIN                                      |     | IMT        |
| Ray WA [130] (USA)                                            | 2005 Dec. | MGI | Opinion                                     | CIN, U/RC                                |     | MISE       |
| Holbrook A [131] (USA)                                        | 2005 Oct. | –   | Review                                      | CIN                                      |     |            |
| Schneeweiss S [62] (USA)                                      | 2005 Jun. | GER | Analysis                                    | U/RC                                     |     |            |
| Suissa S [71] (Canada)                                        | 2005 Apr. | ALL | Reanalysis                                  |                                          |     | IMT        |
| Schneeweiss S [3] (USA)                                       | 2005 Apr. | PUB | Review                                      | CIN, U/RC                                |     | MISE, MISO |
| Schneeweiss S [132] (USA)                                     | 2004 Dec. | PSY | Analysis                                    | U/RC                                     |     |            |
| Kiri VA/ Suissa S [133] (United<br>Kingdom/ Canada) (See #72) | 2004 Jul. | RES | Letter to the<br>editor/ author<br>response | CIN                                      |     | IMT        |
| Suissa S [72] (Canada)                                        | 2004 Jul. | RES | Reanalysis                                  |                                          |     | IMT        |
| Bannwarth B [134] (France)                                    | 2004 Jul. | –   | Opinion                                     | CIN, U/RC                                |     |            |
| Zhan C [135] (USA)                                            | 2003 Dec. | –   | Review                                      | CON                                      | MD  | MISO       |

|                                               |           |     |                      |      |    |                                                                                     |     |
|-----------------------------------------------|-----------|-----|----------------------|------|----|-------------------------------------------------------------------------------------|-----|
| Sin DD [73]/ Pride NB [74] (Canada) (See #75) | 2003 Jul. | RES | Letter to the editor |      |    |                                                                                     | IMT |
| Suissa S [75] (Canada)                        | 2003 Jul. | RES | Reanalysis           |      |    |                                                                                     | IMT |
| Oostenbrink R [151] (Netherlands)             | 2003 Jun. | PUB | Opinion              |      | MD | Verification/referral/workup bias, incorporation/test review/diagnostic review bias |     |
| Ray WA [164] (USA)                            | 2002 Dic. | PHA | Analysis             |      |    | MISE                                                                                |     |
| Strom BL [136] (USA)                          | 2001 Aug. | PHA | Review               | U/RC | MD | MISO                                                                                |     |
| Sørensen HT [137] (Denmark)                   | 2001 Jun. | –   | Review               | CON  | MD | MISO                                                                                |     |
| Hallas J [138] (Denmark)                      | 2001 Jun. | –   | Review               | CIN  |    | MISE                                                                                |     |
| Skegg DC [139] (New Zealand)                  | 2000 Nov. | –   | Opinion              | U/RC |    |                                                                                     |     |

\* Journal category in the year of publication of the article according to the Journal Citation Reports®, available at <https://jcr.incites.thomsonreuters.com/>. If the journal was indexed under more than one category, the category under which it was best ranked was considered. Abbreviations: ALL, Allergy; ANE, Anesthesiology; END, Endocrinology & metabolism; GAS, Gastroenterology & hepatology; GER, Geriatrics & gerontology; HCS, Health care sciences & services; HPS, Health policy & services; MGI, Medicine, general & internal; NEU, Clinical neurology; OBS, Obstetrics & gynecology; ONC, Oncology; PHA, Pharmacology & pharmacy; PSY, Psychiatry; PUB, Public, environmental & occupational health; RES, Respiratory system; RHE, Rheumatology; TOX, Toxicology; TRA, Transplantation; –, Not indexed.

† The categories/subcategories of biases are described in Table 1. If the article mentions a subcategory of bias different to those indicated in Table 1, the name of the bias is specified. If the article does not mention a subcategory of bias, the acronym for the general category is used: CON, Confounding; CIN, Confounding by indication; TDC, Time-dependent confounding; U/RC, Unmeasured/residual confounding; HUE, Healthy user/adherer effect; SEL, Selection bias; PRO, Protopathic bias; INC, Losses to follow-up (informative censoring); DEP, Depletion of susceptibles (prevalent user bias); MD, Missing data; MEA, Measurement bias; MIS, Misclassification bias; MISE, Misclassification of exposure; MISO, Misclassification of outcome; TIM, Time-related bias; IMT, Immortal time bias; ITB, Immeasurable time bias; TWB, Time-window bias; TLB, Time-lag bias.
